# Supplementary material for: Efficacy and Safety of a Protein-Based SARS-CoV-2 Vaccine: A Randomized Clinical Trial
Source: PubMed Central journal article supplement (PMC10157429; doi:10.1001/jamanetworkopen.2023.10302), 2023-05-03
Supplement: jamanetwopen-e2310302-s002.pdf [file jamanetwopen-e2310302-s002.pdf]

## Supplementary Online Content

Mostafavi E, Eybpoosh S, Karamouzian M, et al. Efficacy and safety of a protein-based SARS-CoV-2 vaccine: a randomized clinical trial. *JAMA Netw Open*. 2023;6(5):e2310302. doi:10.1001/jamanetworkopen.2023.10302

**eFigure 1.** Study Sites of the Soberana Trial in Iran

**eAppendix.** List of Participating Sites and Address of Different Units Within Each City

**eMethods.** Detailed Methods

**eFigure 2.** Schoenfeld Residual Plots and Estimated Log-Log Survival Curves for Assessing the Proportional Hazard Assumption

**eTable 1.** Vaccine Efficacy Against SARS-CoV-2 14 Days in Different Subgroups Based on Stratified Cox Regression

**eTable 2.** Vaccine Efficacy Against SARS-CoV-2 Using the Logistic Model

**eTable 3.** Vaccine Efficacy Against SARS-CoV-2 in Different Subgroups Based on Logistic Regression

**eResults.** Detailed Results

**eFigure 3.** Humoral Immune Response (Anti SARS-CoV-2 S1 IgG and Neutralizing Antibodies Titers) in the Vaccine and Placebo Groups

**eTable 4.** Seroconversion Rate in Different Subgroups After the First, Second, and Third Doses

**eTable 5.** Adverse Events (AEs) From Day 0 to Day 28

**eTable 6.** Local and Systemic Adverse Events After Injection of the First, Second and Third Doses

**eTable 7.** Serious and Medically Attended Adverse Events (SAEs) From Day 0 Up to Day 120

**eTable 8.** Serious and Medically Attended Adverse Events by MedDRA System Organ Class During the Study, in Randomized Participants Who Received at Least One Dose

**eTable 9.** The Number Needed to Vaccinate in Cohort 1 and Cohort 2

**eTable 10.** Reason for Unmet Inclusion Criteria in Screened Participants

**eFigure 4.** Percentage of Different SARS-CoV-2 Variants of Concern During the Study

**eReferences**

This supplementary material has been provided by the authors to give readers additional information about their work.

eFigure 1. Study sites of the SOBERANA trial in Iran. The sample size in each city was 3000 people.

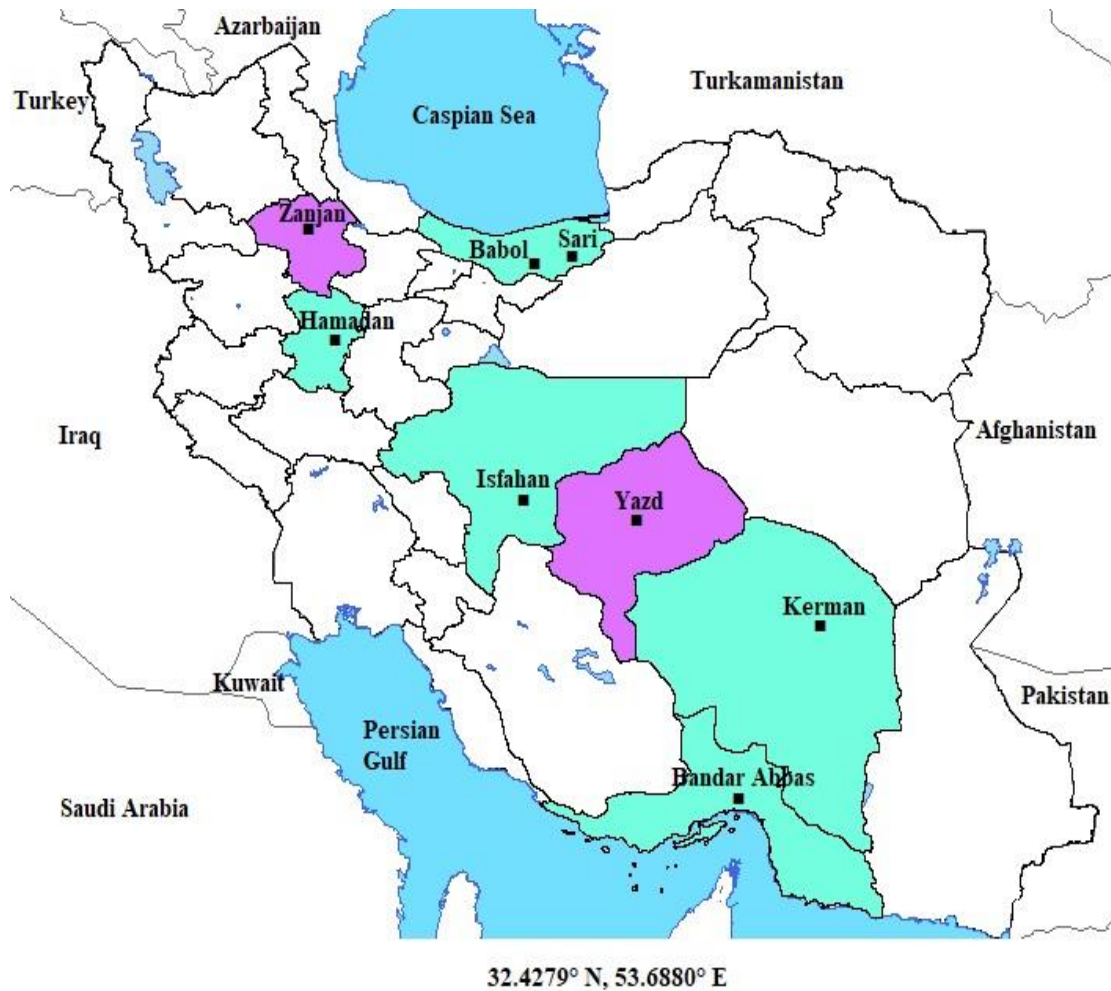

- Cohort 1: 2-dose regimen (i.e., SOBERANA 02)
- Cohort 2: 3-dose regimen (i.e., SOBERANA 02+ a third dose of SOBERANA Plus)

**eAppendix. List of participating sites and address of different units within each city**

| <b>City</b>         | <b>Vaccination site</b>                                                               | <b>Hospital</b>                                                                        | <b>Outpatient department</b>                                                                          | <b>Laboratory</b>                                                                                   |
|---------------------|---------------------------------------------------------------------------------------|----------------------------------------------------------------------------------------|-------------------------------------------------------------------------------------------------------|-----------------------------------------------------------------------------------------------------|
| <b>Zanjan</b>       | Zanjan vaccination center, Amir Kabir Blvd, Emam street, Zanjan                       | Valiasr hospital, Valiasr Square, Zanjan<br>Mousavi hospital, Dr. Sobouti Blvd. Zanjan | The sixteen-hour health center, Jomhuri Eslami Blvd, Zanjan                                           | Core facilities, Zanjan secretary of health, Amir Kabir Blvd, Emam street, Zanjan                   |
| <b>Hamadan</b>      | Hamadan vaccination center, Palestine Square, Hamadan                                 | Besat hospital, Resalat Square, Hamadan                                                | Dibaj sixteen-hour health center, Mirzazadeh Eshghi Street, Hamadan                                   | Farzan Molecular and Pathobiology Laboratory, The Mausoleum of Avicenna, Hamadan                    |
| <b>Kerman</b>       | Kerman vaccination center, Jomhuri Eslami Blvd, Kerman                                | Shafa hospital, Shafa Street, Kerman                                                   | Dr. Dabiri Laboratory, Jihad Blvd, Kerman                                                             | Iranian clinical And Surgical Pathology Laboratory, Imam Jomeh Street, Kerman                       |
| <b>Yazd</b>         | Yazd vaccination center, Safaeieh, Yazd                                               | Shahid Sadoughi hospital, Shahid Ghandi Blvd, Yazd                                     | ImamShahr medical center, 17 Shahrivar Blvd, Yazd                                                     | Haj Maghsoodi Health center, Atlasi Blvd, Yazd                                                      |
| <b>Sari</b>         | Nasibeh University of Nursing and Midwifery, Amir Mazandarani Blvd Vesal Street, Sari | Imam Khomeini hospital, Amir Mazandarani Blvd, Sari                                    | No. 6 Sixteen-hour health center, Saat Square, Sari                                                   | Shahid Babaei Health center, Taleghani Blvd, Salman Farsi Street, Sari                              |
| <b>Babol</b>        | Babol vaccination center, Daneshagh Square, Babol                                     | Shahid Beheshti hospital, Shahid Keshvari Square, Babol                                | Ali ebne Moosalreza center, Taleghani Blvd, Babol<br><br>Shahid Keshvari center, Navvab Street, Babol | Razi laboratory, Modarres Street, Babol                                                             |
| <b>Bandar Abbas</b> | Bandar Abbas vaccination center, Payambar Azam Block, Bandar Abbas                    | Shahid Mohammadi hospital, Jomhuri Eslami Blvd, Bandar Abbas                           | Medical laboratory and health center in Bandar Abbas, Jomhuri Eslami Blvd, Bandar Abbas               | Medical laboratory, Jomhuri Eslami Blvd, Bandar Abbas                                               |
| <b>Isfahan</b>      | Isfahan vaccination center, Hakim Nezami Street, Isfahan                              | Noor hospital, Ostandari Street, Isfahan                                               | Navvab Safavi health center, Ahamd Abad Square, Isfahan                                               | Bonakdar health center, Jay Street, Isfahan<br><br>Motamed health center, Taleghani Street, Isfahan |

## eMethods. Detailed Methods

### 2.1 Description and composition of investigational products

The initial binding of viral particles is mediated by the SARS-CoV-2 Spike (S)-glycoprotein trimer via its Receptor Binding Domain (RBD) to the host's cell surface receptor, the angiotensin-converting enzyme 2 (ACE2). By focusing on the whole S-protein or the RBD as antigen, the primary goal lies in the induction of anti-RBD antibodies interfering with the RBD-ACE2 interaction, blocking the first step of infection and usually not participating in antibody-dependent enhancement (ADE). RBD fragments in the S-glycoprotein trimer can adopt two different conformations on the virus surface: the “down” conformation with a well-camouflaged critical receptor-binding motif (RBM), and the “up” conformation with the RBM exposed and ready to bind to the ACE2 receptor in the human host cells. However, the “up” conformation also exposes the RBM epitopes to the immune system, allowing the induction of potent neutralizing antibodies. Recombinant low-molecular weight RBD exposes not only the RBM but also other protein epitopes that might become immunodominant, thus deflecting the immune response against less relevant epitopes in terms of neutralization. This conjugate vaccine was developed under the hypothesis that the proportion of high neutralizing antibodies would be significantly increased if the macromolecular RBD conjugate construct could mimic the RBD in the “up” conformation, thus mainly exposing the RBM surface. The RBD-recombinant sequence selected as purified antigen for the vaccine comprises amino acids 319-541 of protein S, which means a prolongation at N and C terminal extremes of the RBD structure (Thr333 to Pro527).

This recombinant RBD 319-541 includes at the C-terminal fragment an unpaired Cys538, a residue far away from the RBM and suitable for site-selective bioconjugation into a carrier protein bearing thiophilic groups such as maleimide. This biomimetic design is based on the hypothesis that by conjugating several copies of the RBD to a large carrier protein, a macromolecular construct can be obtained mimicking the ‘up’ RBD conformation, in which only the RBM is well exposed and available for immune recognition. Besides Cys538, the RBD contains eight additional Cys forming four disulfide bridges, three of them stabilizing the so-called RBD “core” and one within the RBM.

Conjugation technology (by Michael's addition) has been used for more than 15 years for various vaccine candidates in Finlay Institute and constitutes a well-known platform with broad evidence of performance. It is the method developed and used to produce the active ingredient of the Cuban conjugate vaccine Quimi-Hib®, which has demonstrated its safety and efficacy in the infant population and has been incorporated into the Cuban National Vaccination Program since 2004. Tetanus toxoid was selected as a carrier protein. It has a proven performance of many years in conjugate vaccines and is part of several vaccine candidates developed at the Finlay institute. Industrial production capacities are available to manufacturing with API Quality for vaccines such as Heberpenta® and Carrier Protein Quality for conjugate vaccines such as Quimi-Hib® and pneumococcus. The immunogenic effect of Tetanus Toxoid (TT) as a carrier of viral proteins has not been assessed previously for SARS-CoV-2 or any other coronavirus. The presence of multiple T and B-cell epitopes of this highly immunogenic carrier, as part of a conjugate construction, might help potentiate cellular immunity as compared to the use of the RBD alone and even the whole S protein. In this vaccine, the CHO expression system was used to ensure proper glycosylation of amino acids 331, 343, 323 and 325 to resemble that of RBD in the virus. Evidence in the literature indicates that RBD expressed as a recombinant protein is not toxic, regardless of its exact sequence and expression system.

SOBERANA 02 and SOBERANA Plus vaccines are developed and produced at the Finlay Vaccine Institute of Cuba and manufactured at Pasteur institute of Iran as Pastocovac® and Pastocovac plus® after a successful technology transfer.

**Composition of SOBERANA 02 vaccine:** SOBERANA 02 is the first conjugated vaccine developed for SARS CoV-2 prevention, presented as an opalescent white suspension that slowly tends to form a white deposit, which is easily re-suspended with shaking. The antigen selected for this vaccine candidate against COVID-19 is (25µg) the recombinant receptor binding domain (RBD) protein conjugated chemically to tetanus toxoid (TT) in a molar ratio of 6/1 (referred to RBD6-TT: conjugate with six molecules of RBD per molecule of tetanus toxoid). The storage condition for this product is 2 to 8° C.

**Composition of SOBERANA Plus vaccine:** The antigen selected for this vaccine candidate against COVID-19, is a dimer of RBD (50 µg) with sequence 319-541, dimerized from an interchain disulfide bridge between a cysteine at position 538 of each monomer, adsorbed on Alumina to form an Opalescent white suspension that slowly tends to form a white deposit, which is easily resuspended with shaking. Also, a single dose of SOBERANA Plus is an

excellent booster of natural immunity in convalescence through a mechanism named hybrid immunity. The storage condition for this product is 2 to 8°C.

**Composition of the placebo:** The placebo formulation was the same as the vaccine candidates without any antigens included.

| <b>Soberana 02 Vaccine Component</b>           | <b>Quantity in the unit of measure (0,5 mL)</b> |
|------------------------------------------------|-------------------------------------------------|
| RBD of SARS-CoV-2 conjugated to tetanus toxoid | 25 µg                                           |
| Disodium hydrogen phosphate                    | 0.03 mg                                         |
| Sodium dihydrogen phosphate                    | 0.02 mg                                         |
| Sodium Chloride                                | 4.25 mg                                         |
| H2O                                            | 0.5 ml                                          |
| Aluminum hydroxide                             | 0.5 mg                                          |

| <b>Soberana Plus Vaccine Component</b> | <b>Quantity in the unit of measure (0,5 mL)</b> |
|----------------------------------------|-------------------------------------------------|
| RBD of SARS-CoV-2                      | 50 µg                                           |
| Disodium hydrogen phosphate            | 0.03 mg                                         |
| Sodium dihydrogen phosphate            | 0.02 mg                                         |
| Sodium Chloride                        | 4.25 mg                                         |
| H2O                                    | 0.5 ml                                          |
| Aluminum hydroxide                     | 1.25 mg                                         |

| <b>Placebo Component</b>    | <b>Quantity in the unit of measure (0,5 mL)</b> |
|-----------------------------|-------------------------------------------------|
| Disodium hydrogen phosphate | 0.03 mg                                         |
| Sodium dihydrogen phosphate | 0.02 mg                                         |
| Sodium Chloride             | 4.25 mg                                         |
| H2O                         | 0.5 ml                                          |
| Aluminum hydroxide          | 0.5 mg                                          |

## 2.2 Endpoint Definitions of Covid-19 cases

Symptomatic cases were defined as those presenting with two or more of the following symptoms lasting for over 24 hours confirmed with an additional positive RT-PCR testing: Fever (temperature  $\geq 38^{\circ}\text{C}$ ), chills, sore throat, nasal congestion, fatigue, muscle or body pain, headache, nausea or vomiting, diarrhoea, loss of smell or taste, or at least one respiratory sign or symptom (i.e., cough, shortness of breath, or clinical or radiographic evidence of pneumonia).

Severe cases were defined as patients with O<sub>2</sub> saturation level  $\leq 90\%$ , evidence of lower respiratory disease (e.g., shortness of breath, chest pain, or chest tightness) with or without fever  $\geq 38^{\circ}\text{C}$  during clinical assessment or imaging, tachypnea (i.e., respiration rate  $>30$  breaths/min), increased P(A-a) O<sub>2</sub> gradient, lung infiltration  $>50\%$  in CT-scans, PaO<sub>2</sub>/FiO<sub>2</sub>  $<300$  mmHg, or acute worsening of respiratory symptoms especially dyspnea, respiratory failure, septic shock, and/or multiple organ dysfunction, hospitalization or death due to COVID-19.

### **2.3 Global Initiative on Sharing Avian Influenza Data (GISAID) accession numbers**

EPI\_ISL\_5885499-602, EPI\_ISL\_5885604-98, EPI\_ISL\_5885702-6, EPI\_ISL\_5885708-70, EPI\_ISL\_5885772, EPI\_ISL\_5885774, EPI\_ISL\_5885777-86, EPI\_ISL\_5885789, EPI\_ISL\_5885793-9, EPI\_ISL\_5885804, EPI\_ISL\_5885808 to EPI\_ISL\_5885811, EPI\_ISL\_5885814, EPI\_ISL\_5885817-18, EPI\_ISL\_5885821-23, EPI\_ISL\_5885828-32, EPI\_ISL\_5885835, EPI\_ISL\_5885837, EPI\_ISL\_5885839-48, EPI\_ISL\_5885850, EPI\_ISL\_5885852-62, EPI\_ISL\_5885865, EPI\_ISL\_5885867-75, EPI\_ISL\_5885879, EPI\_ISL\_5885885, EPI\_ISL\_5885889, EPI\_ISL\_5885894, EPI\_ISL\_5885898, EPI\_ISL\_5885903-6, EPI\_ISL\_5885908, EPI\_ISL\_5885914-7, EPI\_ISL\_5885922, EPI\_ISL\_5885928, EPI\_ISL\_5885933, EPI\_ISL\_5885939, EPI\_ISL\_5885944, EPI\_ISL\_5885950-2, EPI\_ISL\_5885958-91, EPI\_ISL\_5885996, and EPI\_ISL\_6134610 -26.

## 2.4 Sample size calculation

Separate power calculations were performed for the two cohorts. To demonstrate a clinically meaningful difference, we assumed 50% efficacy for two-dose regimens (C1) based on WHO criteria and hypothesized 70% efficacy for the three-dose regimen (C2) based on an independent Technical Support Committee (TSC) opinion that considered the immune response results observed in phases I and II trials of the 2 and 3 dose regimens<sup>1-4</sup> (1-4). Other assumptions included an exponential distribution, minimum baseline incidence of disease in two (0.012) and three-month (0.018) follow-ups (incidence rate: 0.0055 per month)<sup>5,6</sup>, maximum dropout proportion of 10% and 20%<sup>7,8</sup>, and a vaccine to placebo ratio of 4:1. Type I (a two-sided hypothesis) and type II errors of 0.05 and 0.1 were considered for sample size calculation in each cohort. The total sample size was calculated to be about 18,000 participants in C1 (14,400 in the vaccine and 3,600 in the placebo group) and 6,000 participants in C2 (4,800 in the vaccine and 1,200 in the placebo group) using Stata software.

### Software command for sample size calculation

Software: Stata (v.14.2)

Cohort 1

```
power exponential 0.0055, hratio(0.5) power(0.9) nratio(4) fperiod(2) lossprob(0.1) losstime(2)
```

Cohort 2

```
power exponential 0.0055, hratio(0.3) power(0.9) nratio(4) fperiod(3) lossprob(0.2) losstime(3)
```



## 2.5 Sampling Procedure of the Serology Subset

An anti-SARS-CoV-2 ELISA kit was used to determine anti-S1 IgG antibodies in serum samples of a subgroup of the studied population.

We selected two of the six cities (Sari and Babol) in C1 and one of the two cities (Zanjan) in C2 using a pseudo-random number generator. In the selected cities of Sari and Babol, the blood samples of all participants were tested, and in Zanjan, participants were selected via simple random sampling. Serum samples were obtained from ~30% of all the participants (C1: n=5,905 in Sari and Babol) and (C2: n=1,975 in Zanjan) on day 0.

## 2.6 Statistical analysis

Follow-up time was divided into fixed one-week intervals to get a discrete-time survival (long person-time) format. VE along was calculated using a stratified cox proportional hazard (PH) regression model, where the cities were included in the model as the stratum variable. The PH assumption was assessed using Schoenfeld residuals for the stratified Cox proportional regression model and log-log plot (eFigure 2). A sensitivity analysis was conducted to evaluate the extreme scenarios of complete positive and negative correlations between censoring and events of interest to ensure the independent censoring assumption was met. As a sensitivity analysis, VE was also estimated through a logistic regression on the long person-time format dataset using an exchangeable correlation matrix (eTables 2 and 3). VE was defined as a  $1 - \exp(\beta)$ . In both models,  $\exp(\beta)$  could be a reasonable estimation of the risk ratio (RR).<sup>9-11</sup> Standard errors were calculated using a robust estimation method. The origin and the start of the follow-up time were the exact dates as randomization. The data lock date was August 22, 2021, for C1 and October 02, 2021, for C2.

The effects of age, sex, and underlying diseases on the VE were assessed in bivariable models. Cumulative incidence curves ( $1 -$  Kaplan-Meier estimate) were plotted. The number needed to vaccinate (NNV) was calculated.

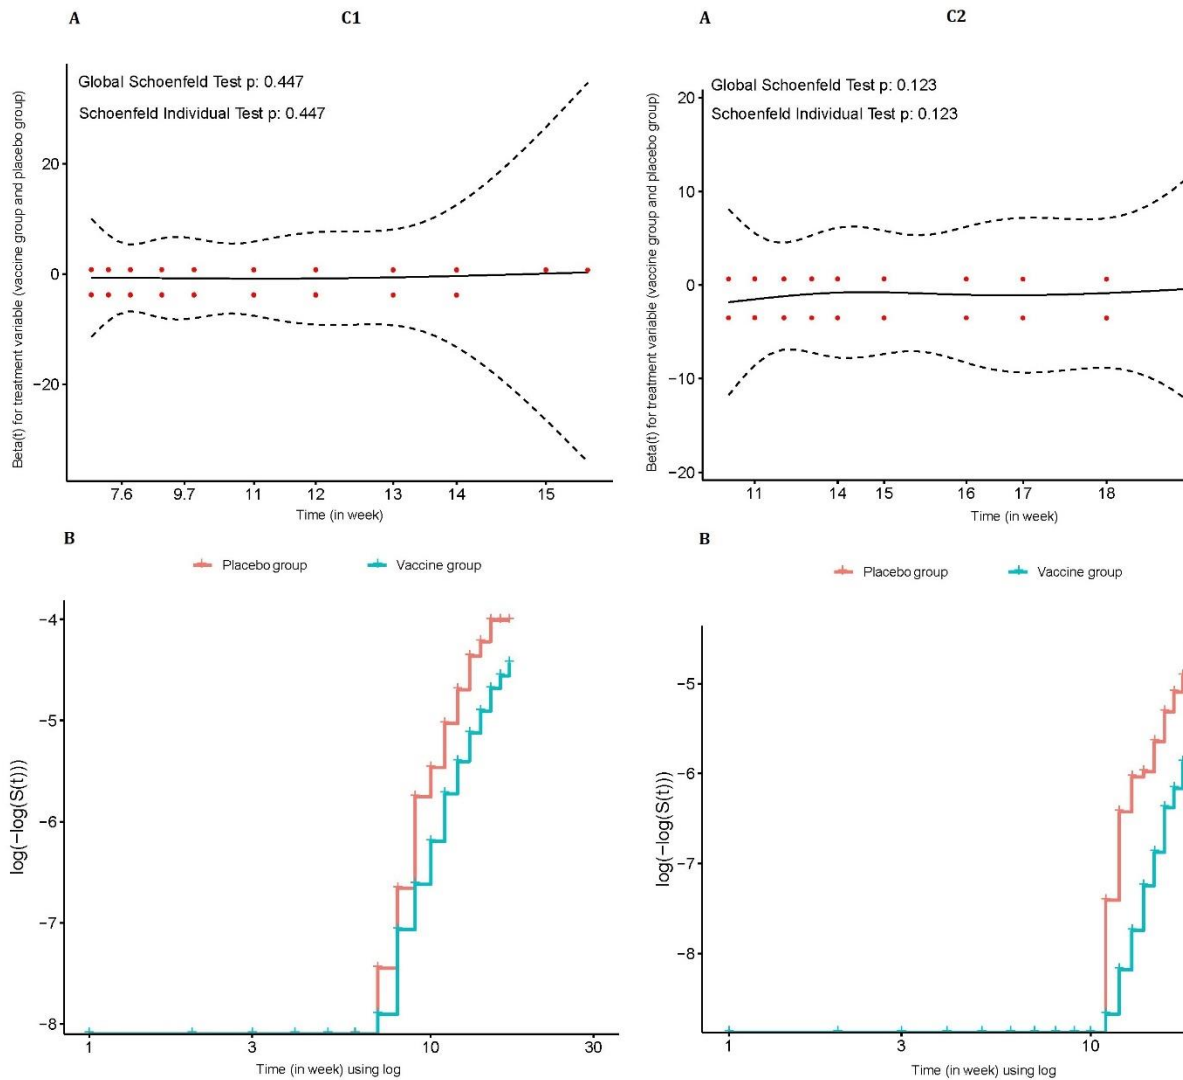

**eFigure 2. Schoenfeld residual plots and estimated log-log survival curves for assessing the proportional hazard assumption.**

**Notes:** A: Schoenfeld residual plots and B: log-log survival curves. The estimated log-log survival curves and Schoenfeld residual plots for the primary outcome show the PH assumption is satisfied in both C1 and C2.

**eTable 1. Vaccine Efficacy against SARS-CoV-2 14 days in different subgroups based on stratified cox regression**

|                                   | Cohort 1 (C1)   |                  |                      |          | Cohort 2 (C2)  |                |                     |          |
|-----------------------------------|-----------------|------------------|----------------------|----------|----------------|----------------|---------------------|----------|
| <b>Symptomatic COVID-19 cases</b> |                 |                  |                      |          |                |                |                     |          |
| <b>Variables</b>                  | Placebo         | Vaccine          | VE (95% CI*)         | <i>P</i> | Placebo        | Vaccine        | VE (95% CI*)        | <i>P</i> |
| <b>Gender</b>                     |                 |                  |                      |          |                |                |                     |          |
| Men                               | 124/2129 (5.8%) | 290/8648 (3.4%)  | 44.1% (30.8-54.9)    | 0.120    | 32/717 (4.5%)  | 47/2869 (1.6%) | 64.9% (44.7-77.7)   | 0.983    |
| Women                             | 97/1471 (6.6%)  | 171/5752 (3.0%)  | 57.2% (44.9-66.8)    |          | 19/483 (3.9%)  | 28/1931 (1.5%) | 64.4% (35.7-80.3)   |          |
| <b>Age</b>                        |                 |                  |                      |          |                |                |                     |          |
| ≤65                               | 219/3514 (6.2%) | 458/14055 (3.3%) | 49.6% (40.7-57.2)    | 0.730    | 51/1172 (4.4%) | 75/4683 (1.6%) | 64.9% (49.7-75.5)   | NA       |
| >65                               | 2/86 (2.3%)     | 3/345 (0.9%)     | 51.3% (-189.4-91.8)‡ |          | 0/28 (0.0%)    | 0/117 (0.0%)   | NA                  |          |
| <b>Underlying disease</b>         |                 |                  |                      |          |                |                |                     |          |
| Yes                               | 56/973 (5.8%)   | 151/4266 (3.5%)  | 40.6% (18.9-56.5)    | 0.200    | 15/352 (4.3%)  | 23/1448 (1.6%) | 63.3% (29.1-81.1)   | 0.890    |
| No                                | 165/2627 (6.3%) | 310/10134 (3.0%) | 53.2% (43.3-61.3)    |          | 36/848 (4.2%)  | 52/3352 (1.6%) | 65.4% (46.9-77.5)   |          |
| <b>Severe COVID-19 cases</b>      |                 |                  |                      |          |                |                |                     |          |
| <b>Gender</b>                     |                 |                  |                      |          |                |                |                     |          |
| Men                               | 14/2129 (0.7%)  | 22/8648 (0.3%)   | 62.4% (26.2-80.8)    | 0.036    | 4/717 (0.6%)   | 1/2869 (0.0%)  | 94.1% (47.4-99.3)   | NA       |
| Women                             | 11/1471 (0.7%)  | 4/5752 (0.1%)    | 90.9% (70.8-97.1)    |          | 3/483 (0.6%)   | 0/1931 (0.0%)  | NA                  |          |
| <b>Age</b>                        |                 |                  |                      |          |                |                |                     |          |
| ≤65                               | 25/3514 (0.7%)  | 26/14055 (0.2%)  | 74.9% (56.4-85.5)    | NA       | 7/1172 (0.6%)  | 1/4682 (0.0%)  | 96.6% (72.2-99.6)   | NA       |
| >65                               | 0/86 (0.0%)     | 0/345 (0.0%)     | NA                   |          | 0/28 (0.0%)    | 0/117 (0.0%)   | NA                  |          |
| <b>Underlying disease</b>         |                 |                  |                      |          |                |                |                     |          |
| Yes                               | 13/973 (1.3%)   | 12/4266 (0.3%)   | 79.5% (55.0-90.7)    | 0.540    | 2/352 (0.6%)   | 1/1448 (0.1%)  | 88.2% (-30.2-98.9)‡ | NA       |
| No                                | 12/2627 (0.5%)  | 14/10134 (0.1%)  | 71.1% (37.3-86.7)    |          | 5/848 (0.6%)   | 0/3352 (0.0%)  | NA                  |          |

Notes: NA: Not applicable due to small cell sizes.

VE: Vaccine Efficacy; CI: Confidence Interval

‡The VE estimate is unstable due to the relatively small number of participants and the low number of observed events, resulting in a very wide confidence interval.

\*P-values were obtained based on the significance of interaction terms.

**eTable 2. Vaccine efficacy against SARS-CoV-2 using the logistic model**

| Condition                            | Total cases | Placebo         | Vaccine          | Vaccine efficacy (95%CI) |
|--------------------------------------|-------------|-----------------|------------------|--------------------------|
| <b>14 days after the second dose</b> |             |                 |                  |                          |
| Confirmed symptomatic COVID-19       | 682         | 221/3600 (6.1%) | 461/14400 (3.2%) | 49.4% (40.5-56.9)        |
| Severe cases                         | 51          | 25/3600 (0.7%)  | 26/14400 (0.2%)  | 74.6% (56.0-85.3)        |
| Hospitalization                      | 48          | 25/3600 (0.7%)  | 23/14400 (0.2%)  | 77.5% (60.2-87.2)        |
| <b>14 days after the third dose</b>  |             |                 |                  |                          |
| Confirmed symptomatic COVID-19       | 126         | 51/1200 (4.3%)  | 75/4800 (1.6%)   | 64.6% (49.4-75.2)        |
| Severe cases                         | 8           | 7/1200 (0.6%)   | 1/4800 (0.0%)    | 96.6% (72.0-99.6)        |
| Hospitalization                      | 8           | 7/1200 (0.6%)   | 1/4800 (0.0%)    | 96.6% (72.0-99.6)        |

**eTable 3 Vaccine efficacy against SARS-CoV-2 in different subgroups based on logistic regression**

|                                   | Cohort 1 (C1)   |                  |                      |       | Cohort 2 (C2)  |                |                     |       |
|-----------------------------------|-----------------|------------------|----------------------|-------|----------------|----------------|---------------------|-------|
| <b>Symptomatic COVID-19 cases</b> | Placebo         | Vaccine          | VE (95% CI)*         | P     | Placebo        | Vaccine        | VE (95% CI*)        | P     |
| <b>Gender</b>                     |                 |                  |                      |       |                |                |                     |       |
| Men                               | 124/2129 (5.8%) | 290/8648 (3.4%)  | 43.8% (30.5-54.5)    | 0.121 | 32/717 (4.5%)  | 47/2869 (1.6%) | 64.7% (44.5-77.5)   | 0.977 |
| Women                             | 97/1471 (6.6%)  | 171/5752 (3.0%)  | 56.8% (44.4-66.4)    |       | 19/483 (3.9%)  | 28/1931 (1.5%) | 64.1% (35.2-80.1)   |       |
| <b>Age</b>                        |                 |                  |                      |       |                |                |                     |       |
| ≤65                               | 219/3514 (6.2%) | 458/14055 (3.3%) | 49.3% (40.4-56.9)    | 0.885 | 51/1172 (4.4%) | 75/4683 (1.6%) | 64.6% (49.4-75.2)   | NA    |
| >65                               | 2/86 (2.3%)     | 3/345 (0.9%)     | 49.2% (-221.9-92.0)‡ |       | 0/28 (0.0%)    | 0/117 (0.0%)   | NA                  |       |
| <b>Underlying disease</b>         |                 |                  |                      |       |                |                |                     |       |
| Yes                               | 56/973 (5.8%)   | 151/4266 (3.5%)  | 40.1% (18.4-56.1)    | 0.198 | 15/352 (4.3%)  | 23/1448 (1.6%) | 63.2% (29.2-80.9)   | 0.910 |
| No                                | 165/2627 (6.3%) | 310/10134 (3.0%) | 52.8% (42.9-61.0)    |       | 36/848 (4.2%)  | 52/3352 (1.6%) | 65.0% (46.4-77.1)   |       |
| <b>Severe COVID-19 cases</b>      |                 |                  |                      |       |                |                |                     |       |
| <b>Gender</b>                     |                 |                  |                      |       |                |                |                     |       |
| Men                               | 14/2129 (0.7%)  | 22/8648 (0.3%)   | 62.0% (25.6-80.6)    | 0.036 | 4/717 (0.6%)   | 1/2869 (0.0%)  | 94.0% (46.9-99.3)   | NA    |
| Women                             | 11/1471 (0.7%)  | 4/5752 (0.1%)    | 90.8% (70.5-97.1)    |       | 3/483 (0.6%)   | 0/1931 (0.0%)  | NA                  |       |
| <b>Age</b>                        |                 |                  |                      |       |                |                |                     |       |
| ≤65                               | 25/3514 (0.7%)  | 26/14055 (0.2%)  | 74.6% (56.0-85.4)    | NA    | 7/1172 (0.6%)  | 1/4682 (0.0%)  | 96.6% (72.0-99.6)   | NA    |
| >65                               | 0/86 (0.0%)     | 0/345 (0.0%)     | NA                   |       | 0/28 (0.0%)    | 0/117 (0.0%)   | NA                  |       |
| <b>Underlying disease</b>         |                 |                  |                      |       |                |                |                     |       |
| Yes                               | 13/973 (1.3%)   | 12/4266 (0.3%)   | 79.4% (54.6-90.6)    | 0.538 | 2/352 (0.6%)   | 1/1448 (0.1%)  | 88.1% (-29.4-98.9)‡ | NA    |
| No                                | 12/2627 (0.5%)  | 14/10134 (0.1%)  | 70.8% (36.5-86.5)    |       | 5/848 (0.6%)   | 0/3352 (0.0%)  | NA                  |       |

Notes: NA: Not applicable due to small cell sizes.

VE: Vaccine Efficacy; CI: Confidence Interval

‡The VE estimate is unstable due to the relatively small number of participants and the low number of observed events, resulting in a very wide confidence interval.

\*P-values were obtained based on the significance of interaction terms.

## eResults. Detailed Results

### 2.7 Kinetics of SARS-CoV-2 anti-S IgG and neutralizing antibodies after vaccination

The geometric mean titer (GMT) of IgG in the vaccine group four weeks after the first, second, and third doses were 11.1 RU/ml [9.9-12.4], 119.2 RU/ml [114.1-124.5], and 133.8 RU/ml [128.9-138.8], respectively (eFigure 3). The GMT ratio between the titers after the second and first dose was 10.7 [9.5-12.2] ( $P < 0.001$ ), and between the third and second doses was 1.1 [1.06-1.2] ( $P < 0.001$ ). The corresponding GMT four weeks after the first, second, and third doses were 1.4 RU/ml [1.2-1.7], 4.5 RU/ml [3.9-5.1], and 3.3 RU/ml [2.6-3.8] in the placebo group. In the vaccine group, the seroconversion rates increased four weeks after the second (81.1% [79.7-82.2]) and third (92.9% [91.4-94.2]) doses ( $P < 0.001$ ). In the placebo group, the seroconversion rate was 5.6% ([4.2-7.3];  $P < 0.001$  vs. the vaccine group) after the second dose, and 3.0% ([1.4-5.5];  $P < 0.001$  vs. the vaccine group) after the third dose (eTable 4).

To evaluate the induction of neutralizing antibodies, random serum samples from 112 participants (C1: 11 from the placebo group, 43 from the vaccine group, and C2: 6 from the placebo group, 52 from the vaccine group) were tested (eFigure 3). In the vaccine group, the GMT of neutralizing antibodies in C1 samples on day 56 was 44.9 (28.5, 70.3), and the seroconversion rate was 69.8% (53.8, 82.8). The GMT of neutralizing antibodies in C2 samples from the vaccine group on day 84 was 133 (89.8, 178.4), and the seroconversion rate was 100% (eFigure 3). All samples from the placebo group tested negative for neutralizing antibodies (GMT = 0 and seroconversion rate = 0;  $P = 0.002$  vs. the vaccine group).

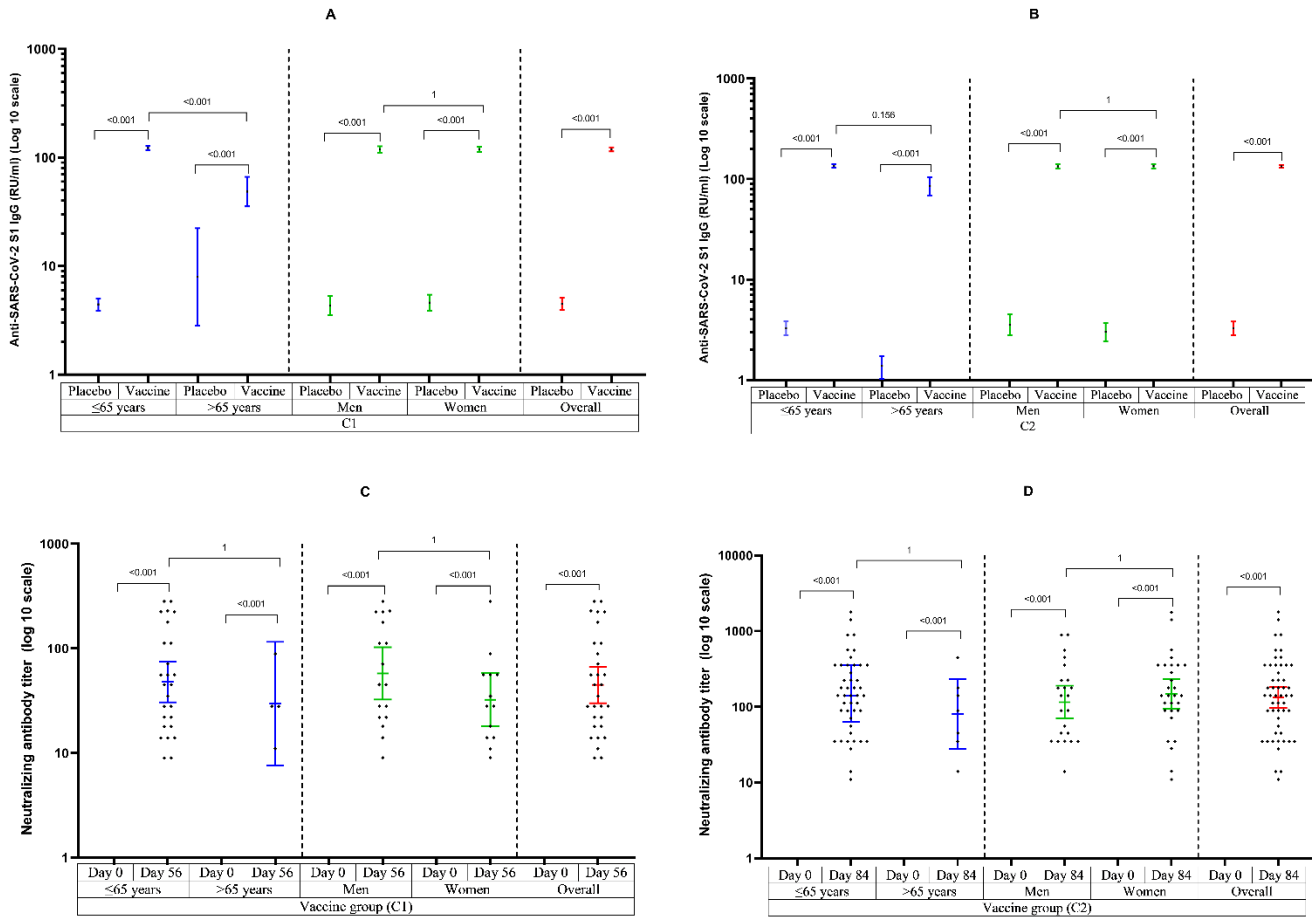

**eFigure 3: Humoral immune response (Anti SARS-CoV-2 S1 IgG and neutralizing antibodies titers) in the vaccine and placebo groups.**

Notes: A) Anti-SARS-CoV-2 S1 IgG titer on the logarithmic scale among participants who received the vaccine by sex and age group and also overall vaccine and placebo on day 56 (C1). B) Anti-SARS-CoV-2 S1 IgG on the logarithmic scale titer among participants who received the vaccine by sex and age group and also overall vaccine and placebo on day 84 (C2). C) Neutralizing antibodies titer on the logarithmic scale among participants who received the vaccine in C1. D) Neutralizing antibodies titer on the logarithmic scale among participants who received the vaccine in C2. The values of neutralizing antibodies for all placebo samples were not shown in Panels C and D (all were negative (titer = 0)). Error bars show geometric mean titers with 95% CI, dots show individual data points. P-values were calculated using the nonparametric bootstrap method with 1000 repetitions and have been adjusted by the Bonferroni correction for multiple comparisons;  $\min\{1, m \times P\text{-value}\}$  where m indicates the number of comparisons.



**eTable 4. Seroconversion rate in different subgroups after the first, second, and third doses**

| Variables                              | Day 28            |                 |        | Day 56 (C1)       |                  |        | Day 84 (C2)       |                |        |
|----------------------------------------|-------------------|-----------------|--------|-------------------|------------------|--------|-------------------|----------------|--------|
|                                        | Vaccine           | Placebo         | P      | Vaccine           | Placebo          | P      | Vaccine           | Placebo        | P      |
| <b>Overall</b>                         | 39.3% (36.7-42)   | 5.8% (3.4-9.1)  | <0.001 | 81.1% (79.7-82.2) | 5.6% (4.2-7.3)   | <0.001 | 92.9% (91.4-94.2) | 3% (1.4-5.5)   | <0.001 |
| <b>Gender</b>                          |                   |                 |        |                   |                  |        |                   |                |        |
| Men                                    | 39.5% (36.3-43.2) | 8.5% (4.8-13.6) | <0.001 | 82.2% (80.5-83.8) | 6.1% (4.2-8.4)   | <0.001 | 94.1% (92.1-95.6) | 2.3% (0.6-5.7) | <0.001 |
| Women                                  | 38.8% (34.7-42.9) | 2.3% (0.4-6.4)  | <0.001 | 79.6% (77.5-81.4) | 5% (3.1-7.5)     | <0.001 | 91.5% (89-93.5)   | 3.9% (1.4-8.2) | <0.001 |
| <b>P-value</b>                         | 0.794             | 0.021           |        | 0.040             | 0.466            |        | 0.054             | 0.400          |        |
| <b>Age</b>                             |                   |                 |        |                   |                  |        |                   |                |        |
| ≤65                                    | 39.9% (37.2-42.6) | 5.8% (3.5-9.1)  | <0.001 | 81.4% (80.1-82.6) | 5.5% (4.1-7.2)   | <0.001 | 92.9% (91.3-94.2) | 3% (1.4-5.5)   | <0.001 |
| >65                                    | 22.7% (11.4-37.8) | 0%              | <0.001 | 69.6% (60.2-77.8) | 10.5% (1.3-33.1) | <0.001 | 93.9% (79.7-99.3) | 0%             | <0.001 |
| <b>P-value</b>                         | 0.021             | 0.665           |        | 0.001             | 0.348            |        | 0.599             | 0.860          |        |
| <b>Underlying diseases</b>             |                   |                 |        |                   |                  |        |                   |                |        |
| Yes                                    | 42.6% (38.1-47.2) | 9% (3.9-16.9)   | <0.001 | 78.9% (76.7-81.1) | 6% (3.6-9.2)     | <0.001 | 91% (87.4-93.8)   | 2.7% (0.3-9.3) | <0.001 |
| No                                     | 37.6% (34.4-40.8) | 4.5% (2.2-8.2)  | <0.001 | 82.3% (80.7-83.8) | 5.5% (3.8-7.5)   | <0.001 | 93.6% (91.9-95)   | 3.2% (1.4-6.1) | <0.001 |
| <b>P-value</b>                         | 0.071             | 0.125           |        | 0.009             | 0.753            |        | 0.103             | 0.825          |        |
| <b>Anti-SARS-CoV-2 S1 IgG on Day 0</b> |                   |                 |        |                   |                  |        |                   |                |        |
| Positive                               | 50% (21.1-78.9)   | 0%              | 0.049  | 69.7% (67.1-72.2) | 1.2% (0.3-3.1)   | <0.001 | 76.7% (72-80.9)   | 0%             | <0.001 |
| Negative                               | 39.3% (36.6-41.9) | 5.9% (3.5-9.2)  | <0.001 | 86.5% (85.2-87.8) | 8% (5.9-10.3)    | <0.001 | 98.8% (97.9-99.4) | 4% (1.9-7.3)   | <0.001 |
| <b>P-value</b>                         | 0.450             | 0.575           |        | <0.001            | <0.001           |        | <0.001            | 0.071          |        |

## **2.8 Vaccine efficacy estimates among the participants with a serological assessment at the baseline**

Of participants who underwent a serological test on day 0 (C1= 5,905, C2= 1,975), 35.7% and 33.7% of those in the vaccine groups, as well as 36.7% and 29.7% in the placebo groups had anti-SARS-CoV-2 S1 IgG, respectively (Table 1).

Among this subpopulation, the vaccine efficacy (VE) in preventing PCR-positive symptomatic COVID-19 was 40.5% (19.8-55.8) in C1; and 65.0% (36.0-80.8), in C2. The VE among the seronegative participants was 54.7% (95% CI: 35.0-68.5), and 64.1% (34.0-80.5) in C, and C2, respectively.

For severe COVID-19 cases, VE could not be estimated due to the small number of events.

**eTable 5. Adverse Events (AEs) from Day 0 to day 28**

|                                | Vaccine group |                   | Placebo group |                   | P-value |
|--------------------------------|---------------|-------------------|---------------|-------------------|---------|
|                                | Events<br>n   | Subjects<br>n (%) | Events<br>n   | Subjects<br>n (%) |         |
| <b>Solicited AEs</b>           |               |                   |               |                   |         |
| Dose 1                         | 16431         | 9812 (51.6)       | 2560          | 1620 (34.1)       | <0.001  |
| Dose 2                         | 13623         | 8656 (47.8)       | 2104          | 1382 (30.6)       | <0.001  |
| Dose 3                         | 2465          | 1493 (35.8)       | 296           | 214 (20.4)        | <0.001  |
| <b>Local AEs</b>               |               |                   |               |                   |         |
| Dose 1                         | 7877          | 7269 (38.2)       | 759           | 737 (15.5)        | <0.001  |
| Dose 2                         | 7013          | 6470 (35.7)       | 666           | 649 (14.4)        | <0.001  |
| Dose 3                         | 1376          | 1042 (25.0)       | 101           | 98 (9.3)          | <0.001  |
| <b>Systemic AEs</b>            |               |                   |               |                   |         |
| Dose 1                         | 8554          | 5585 (29.3)       | 1801          | 1211 (25.5)       | <0.001  |
| Dose 2                         | 6610          | 4427 (24.4)       | 1438          | 977 (21.7)        | <0.001  |
| Dose 3                         | 1089          | 739 (17.7)        | 195           | 148 (14.1)        | 0.005   |
| <b>AEs within 30 minutes</b>   |               |                   |               |                   |         |
| Dose 1                         | 116           | 109 (0.6)         | 20            | 20 (0.4)          | 0.199   |
| Dose 2                         | 51            | 39 (0.2)          | 12            | 10 (0.2)          | 0.936   |
| Dose 3                         | -             | -                 | -             | -                 | -       |
| <b>Unsolicited in 0-2 days</b> |               |                   |               |                   |         |
| Dose 1                         | 2106          | 1696 (8.9)        | 557           | 458 (9.6)         | 0.121   |
| Dose 2                         | 1659          | 1324 (7.3)        | 421           | 334 (7.4)         | 0.823   |
| Dose 3                         | 395           | 330 (7.9)         | 73            | 55 (5.2)          | 0.003   |
| <b>AEs in &gt;2 days</b>       |               |                   |               |                   |         |
| Dose 1                         | 731           | 497 (2.6)         | 183           | 120 (2.5)         | 0.734   |
| Dose 2                         | 704           | 454 (2.5)         | 201           | 126 (2.8)         | 0.274   |
| Dose 3                         | 16            | 15 (0.4)          | 1             | 1 (0.1)           | 0.221   |

**eTable 6. Local and systemic adverse events after injection of the first, second and third doses**

|                                   | Vaccine groups      | Placebo groups     | Risk ratio (95% CI) | P value |
|-----------------------------------|---------------------|--------------------|---------------------|---------|
| <b>Systemic adverse events</b>    |                     |                    |                     |         |
| <b>Any systemic adverse event</b> |                     |                    |                     |         |
| Dose 1                            | 5585/19030 (29.35%) | 1211/4754 (25.47%) | 1.15 (1.09–1.22)    | p<0.001 |
| Dose 2                            | 4427/18115 (24.44%) | 977/4510 (21.66%)  | 1.13 (1.06–1.20)    | 0.003   |
| Dose 3                            | 739/4165 (17.74%)   | 148/1048 (14.12%)  | 1.26 (1.07–1.48)    | 0.095   |
| <b>Fatigue</b>                    |                     |                    |                     |         |
| Dose 1                            | 2380/19030 (12.51%) | 492/4754 (10.35%)  | 1.21 (1.10-1.32)    | 0.001   |
| Dose 2                            | 1971/18115 (10.88%) | 411/4510 (9.11%)   | 1.19 (1.08-1.32)    | 0.014   |
| Dose 3                            | 299/4165 (7.18%)    | 62/1048 (5.92%)    | 1.21 (0.93-1.58)    | 1.000   |
| <b>Headache</b>                   |                     |                    |                     |         |
| Dose 1                            | 2028/19030 (10.66%) | 501/4754 (10.54%)  | 1.01 (0.92-1.11)    | 1.000   |
| Dose 2                            | 1488/18115 (8.21%)  | 349/4510 (7.74%)   | 1.06 (0.95-1.19)    | 1.000   |
| Dose 3                            | 227/4165 (5.45%)    | 51/1048 (4.87%)    | 1.12 (0.83-1.51)    | 1.000   |
| <b>Fever</b>                      |                     |                    |                     |         |
| Dose 1                            | 1244/19030 (6.54%)  | 237/4754 (4.99%)   | 1.31 (1.15-1.50)    | 0.002   |
| Dose 2                            | 819/18115 (4.52%)   | 177/4510 (3.92%)   | 1.15 (0.98-1.35)    | 1.000   |
| Dose 3                            | 151/4165 (3.63%)    | 23/1048 (2.19%)    | 1.65 (1.07-2.55)    | 0.318   |
| <b>Myalgia or asthenia</b>        |                     |                    |                     |         |
| Dose 1                            | 1116/19030 (5.86%)  | 226/4754 (4.75%)   | 1.23 (1.07-1.42)    | 0.063   |
| Dose 2                            | 901/18115 (4.97%)   | 170/4510 (3.77%)   | 1.32 (1.12-1.55)    | 0.016   |
| Dose 3                            | 185/4165 (4.44%)    | 23/1048 (2.19%)    | 2.02 (1.32-3.11)    | 0.021   |
| <b>Pain in the extremity</b>      |                     |                    |                     |         |
| Dose 1                            | 675/19030 (3.55%)   | 128/4754 (2.69%)   | 1.32 (1.09-1.59)    | 0.070   |
| Dose 2                            | 641/18115 (3.54%)   | 124/4510 (2.75%)   | 1.29 (1.06-1.56)    | 0.148   |
| Dose 3                            | 105/4165 (2.52%)    | 11/1048 (1.05%)    | 2.40 (1.30-4.45)    | 0.074   |
| <b>Chills</b>                     |                     |                    |                     |         |
| Dose 1                            | 374/19030 (1.97%)   | 62/4754 (1.30%)    | 1.51 (1.15-1.97)    | 0.052   |
| Dose 2                            | 197/18115 (1.09%)   | 47/4510 (1.04%)    | 1.04 (0.76-1.43)    | 1.000   |

|                                | Vaccine groups      | Placebo groups    | Risk ratio (95% CI) | P value |
|--------------------------------|---------------------|-------------------|---------------------|---------|
| <b>Systemic adverse events</b> |                     |                   |                     |         |
| Dose 3                         | 20/4165 (0.48%)     | 4/1048 (0.38%)    | 1.26 (0.43-3.67)    | 1.000   |
| <b>Diarrhoea</b>               |                     |                   |                     |         |
| Dose 1                         | 328/19030 (1.72%)   | 71/4754 (1.49%)   | 1.15 (0.89-1.49)    | 1.000   |
| Dose 2                         | 241/18115 (1.33%)   | 76/4510 (1.69%)   | 0.79 (0.61-1.02)    | 0.976   |
| Dose 3                         | 45/4165 (1.08%)     | 9/1048 (0.86%)    | 1.26 (0.62-2.57)    | 1.000   |
| <b>Nausea or vomiting</b>      |                     |                   |                     |         |
| Dose 1                         | 277/19030 (1.46%)   | 48/4754 (1.01%)   | 1.44 (1.06-1.96)    | 0.285   |
| Dose 2                         | 258/18115 (1.42%)   | 61/4510 (1.35%)   | 1.05 (0.80-1.39)    | 1.000   |
| Dose 3                         | 41/4165 (0.98%)     | 7/1048 (0.67%)    | 1.47 (0.66-3.28)    | <0.001  |
| <b>Rash</b>                    |                     |                   |                     |         |
| Dose 1                         | 132/19030 (0.69%)   | 36/4754 (0.76%)   | 0.92 (0.63-1.32)    | 1.000   |
| Dose 2                         | 94/18115 (0.52%)    | 23/4510 (0.51%)   | 1.02 (0.65-1.60)    | 0.940   |
| Dose 3                         | 16/4165 (0.38%)     | 5/1048 (0.48%)    | 0.81 (0.30-2.19)    | 1.000   |
| <b>Local adverse events</b>    |                     |                   |                     |         |
| <b>Any local adverse event</b> |                     |                   |                     |         |
| Dose 1                         | 7269/19030 (38.20%) | 737/4754 (15.50%) | 2.46 (2.30–2.64)    | <0.001  |
| Dose 2                         | 6470/18115 (35.72%) | 649/4510 (14.39%) | 2.48 (2.31–2.67)    | <0.001  |
| Dose 3                         | 1042/4165 (25.02%)  | 98/1048 (9.35%)   | 2.68 (2.20–3.25)    | <0.001  |
| <b>Pain</b>                    |                     |                   |                     |         |
| Dose 1                         | 7182/19030 (37.74%) | 710/4754 (14.93%) | 2.53 (2.36-2.71)    | <0.001  |
| Dose 2                         | 6365/18115 (35.14%) | 632/4510 (14.01%) | 2.51 (2.33-2.70)    | <0.001  |
| Dose 3                         | 975/4165 (23.41%)   | 94/1048 (8.97%)   | 2.61 (2.14-3.19)    | <0.001  |
| <b>Warmth</b>                  |                     |                   |                     |         |
| Dose 1                         | 211/19030 (1.11%)   | 23/4754 (0.48%)   | 2.29 (1.49-3.52)    | 0.003   |
| Dose 2                         | 150/18115 (0.83%)   | 10/4510 (0.22%)   | 3.73 (1.97-7.08)    | <0.001  |
| Dose 3                         | 45/4165 (1.08%)     | 1/1048 (0.10%)    | 11.32 (1.56-82.05)  | 0.053   |
| <b>Inflammation</b>            |                     |                   |                     |         |
| Dose 1                         | 206/19030 (1.08%)   | 12/4754 (0.25%)   | 4.29 (2.40-7.67)    | 0.001   |
| Dose 2                         | 222/18115 (1.23%)   | 11/4510 (0.24%)   | 5.02 (2.75-9.20)    | 0.001   |

| <b>Systemic adverse events</b> | <b>Vaccine groups</b> | <b>Placebo groups</b> | <b>Risk ratio (95% CI)</b> | <b>P value</b> |
|--------------------------------|-----------------------|-----------------------|----------------------------|----------------|
| Dose 3                         | 171/4165 (4.11%)      | 2/1048 (0.19%)        | 21.51 (5.35-86.58)         | 0.001          |
| <b>Redness</b>                 |                       |                       |                            |                |
| Dose 1                         | 193/19030 (1.01%)     | 12/4754 (0.25%)       | 4.02 (2.24-7.19)           | <0.001         |
| Dose 2                         | 203/18115 (1.12%)     | 10/4510 (0.22%)       | 5.05 (2.68-9.53)           | <0.001         |
| Dose 3                         | 128/4165 (3.07%)      | 3/1048 (0.29%)        | 10.74 (3.42-33.66)         | <0.001         |
| <b>Induration</b>              |                       |                       |                            |                |
| Dose 1                         | 85/19030 (0.45%)      | 2/4754 (0.04%)        | 10.62 (2.61-43.13)         | 0.001          |
| Dose 2                         | 73/18115 (0.40%)      | 3/4510 (0.07%)        | 6.06 (1.91-19.21)          | 0.013          |
| Dose 3                         | 57/4165 (1.37%)       | 1/1048 (0.10%)        | 14.34 (1.99-103.46)        | 0.012          |

Data are n/N% or risk ratio (95% CI). The safety analysis was done in the per-protocol population, with data from the vaccine groups and the placebo groups in both cohorts combined until the time that participants in cohort 2 alone received dose 3. The risk ratio was the risk in vaccine groups divided by the risk in placebo groups and the 95% CI was calculated as follows:  $\exp \left\{ \ln (\overline{RR}) \pm z_{1-\alpha/2} \sqrt{\frac{(n_1-x_1)/x_1}{n_1} + \frac{(n_2-x_2)/x_2}{n_2}} \right\}$  where RR is the risk ratio,  $n_1$  is the number of people in the vaccine group,  $n_2$  is the number of people in the placebo group,  $x_1$  is the number of people who had an adverse event in the vaccine group, and  $x_2$  is the number who had an adverse event in the placebo group. Significance values were adjusted for multiple comparisons using the Holm–Bonferroni procedure: first, all p values were sorted from smallest to largest and then second, the  $\min \{ 1, (m-i+1) \times p \text{ value} \}$  was considered as the corrected p-value for each, in which  $m$  indicates the number of comparisons and  $i$  shows the  $i$ -th rank.

**eTable 7. Serious and medically-attended adverse events (SAEs) from Day 0 up to Day 120**

| Serious and medically-attended adverse events                | C1                                |                                  | C2                               |                                  | Total<br>N=23959<br>n (%) |
|--------------------------------------------------------------|-----------------------------------|----------------------------------|----------------------------------|----------------------------------|---------------------------|
|                                                              | Vaccine group<br>N=14375<br>n (%) | Placebo group<br>N=3597<br>n (%) | Vaccine group<br>N=4790<br>n (%) | Placebo group<br>N=1197<br>n (%) |                           |
| <b>Total SAEs</b>                                            | 46 (0.3)                          | 10 (0.3)                         | 9 (0.2)                          | 5 (0.4)                          | 70 (0.3)                  |
| Medically-attended                                           | 26 (0.2)                          | 5 (0.1)                          | 5 (0.1)                          | 2 (0.2)                          | 38 (0.2)                  |
| Serious                                                      | 16 (0.1)                          | 2 (<0.1)                         | 3 (<0.1)                         | 2 (0.2)                          | 23 (<0.1)                 |
| Fatal                                                        | 4 (<0.1)                          | 3 (<0.1)                         | 1 (<0.1)                         | 1 (<0.1)                         | 9 (<0.1)                  |
| <b>Related to vaccine</b>                                    | 1 (<0.1)                          | 1 (<0.1)                         | 3 (<0.1)                         | 0 (0.0)                          | 5 (<0.1)                  |
| <b>Leading to the discontinuation from the study vaccine</b> | 18 (0.1)                          | 0 (<0.1)                         | 3 (<0.1)                         | 1 (<0.1)                         | 22 (<0.1)                 |
| <b>Leading to the discontinuation from study</b>             | 4 (<0.1)                          | 2 (<0.1)                         | 2 (<0.1)                         | 1 (<0.1)                         | 9 (<0.1)                  |

The association of events with injections was categorized according to the causality assessment protocol for AEs<sup>12</sup>

**eTable 8. Serious and medically-attended adverse events by MedDRA system organ class during the study, in randomized participants who received at least one dose**

| Adverse events list according to MedDRA system*                 | C1                                |                                  | C2                                |                                  |
|-----------------------------------------------------------------|-----------------------------------|----------------------------------|-----------------------------------|----------------------------------|
|                                                                 | Vaccine group<br>N=14375<br>n (%) | Placebo group<br>N=3597<br>n (%) | Vaccine group<br>N=14375<br>n (%) | Placebo group<br>N=3597<br>n (%) |
| <b>Eye disorders</b>                                            | 6 (<0.1)                          | 0 (0.0)                          | 1 (<0.1)                          | 1 (<0.1)                         |
| Blurred vision                                                  | 3                                 | 0                                | 1                                 | 1                                |
| Eye pain                                                        | 2                                 | 0                                | 0                                 | 0                                |
| Eye floaters                                                    | 1                                 | 0                                | 0                                 | 0                                |
| <b>Immune system disorders</b>                                  | 5 (<0.1)                          | 0 (0.0)                          | 0 (0.0)                           | 0 (0.0)                          |
| Hypersensitivity reaction                                       | 2                                 | 0                                | 0                                 | 0                                |
| Angioedemas                                                     | 1                                 | 0                                | 0                                 | 0                                |
| Urticaria                                                       | 2                                 | 0                                | 0                                 | 0                                |
| <b>Reproductive system and breast disorders</b>                 | 3 (<0.1)                          | 1 (<0.1)                         | 0 (0.0)                           | 1 (<0.1)                         |
| Menometrorrhagia                                                | 2                                 | 0                                | 0                                 | 0                                |
| Vaginal bleeding                                                | 1                                 | 0                                | 0                                 | 0                                |
| Ovarian cyst                                                    | 0                                 | 0                                | 0                                 | 1                                |
| <b>Nervous system disorders</b>                                 | 3 (<0.1)                          | 2 (<0.1)                         | 0 (0.0)                           | 1 (<0.1)                         |
| Headache                                                        | 2                                 | 1                                | 0                                 | 0                                |
| Bell's palsy                                                    | 1                                 | 0                                | 0                                 | 1                                |
| Paraesthesia lower limb                                         | 0                                 | 1                                | 0                                 | 0                                |
| <b>Blood and lymphatic system disorders</b>                     | 1 (<0.1)                          | 0 (0.0)                          | 0 (0.0)                           | 0 (0.0)                          |
| Lymphadenopathy                                                 | 1                                 | 0                                | 0                                 | 0                                |
| <b>General disorders and administration site conditions</b>     | 7 (<0.1)                          | 3 (<0.1)                         | 4 (<0.1)                          | 1 (<0.1)                         |
| Injection site reaction (erythema, redness and oedema)          | 0                                 | 0                                | 2                                 | 0                                |
| Unconsciousness                                                 | 0                                 | 1                                | 1                                 | 0                                |
| Face oedema                                                     | 2                                 | 0                                | 0                                 | 0                                |
| Non-cardiac chest pain                                          | 1                                 | 0                                | 0                                 | 0                                |
| Sudden cardiac death                                            | 1                                 | 0                                | 0                                 | 0                                |
| Cardio-respiratory arrest                                       | 0                                 | 0                                | 0                                 | 1                                |
| Brain death (due to ventricular arrhythmias and cardiac arrest) | 0                                 | 0                                | 1                                 | 0                                |
| Unknown cause of death                                          | 1                                 | 0                                | 0                                 | 0                                |
| Accidental death                                                | 1                                 | 0                                | 0                                 | 0                                |
| COVID-19 death                                                  | 1                                 | 2                                | 0                                 | 0                                |
| <b>Musculoskeletal and connective tissue disorders</b>          | 0 (0.0)                           | 0 (0.0)                          | 1 (<0.1)                          | 0 (0.0)                          |



|                                                            |          |          |          |          |
|------------------------------------------------------------|----------|----------|----------|----------|
| Neck and shoulder pain, with numbness in fingers           | 0        | 0        | 1        | 0        |
| <b>Skin and subcutaneous tissue</b>                        | 3 (<0.1) | 1 (<0.1) | 0 (0.0)  | 0 (0.0)  |
| Generalized maculopapular rash                             | 1        | 1        | 0        | 0        |
| Generalized itching                                        | 1        | 0        | 0        | 0        |
| Blistering of hand                                         | 1        | 0        | 0        | 0        |
| <b>Gastrointestinal disorders</b>                          | 2 (<0.1) | 1 (<0.1) | 1 (<0.1) | 0 (0.0)  |
| Abdominal pain and fecal impaction (causing obstruction)   | 0        | 0        | 1        | 0        |
| Vomiting                                                   | 1        | 1        | 0        | 0        |
| Haematochezia and                                          | 1        | 0        | 0        | 0        |
| <b>Obstetric and gynaecological therapeutic procedures</b> | 2 (<0.1) | 0 (0.0)  | 0 (0.0)  | 0 (0.0)  |
| Induced abortions                                          | 2        | 0        | 0        | 0        |
| <b>Pregnancy, puerperium and perinatal conditions</b>      | 3 (<0.1) | 1 (<0.1) | 1 (<0.1) | 0 (0.0)  |
| Spontaneous abortion                                       | 3        | 0        | 1        | 0        |
| Ectopic pregnancy                                          | 0        | 1        | 0        | 0        |
| <b>Renal and urinary disorders</b>                         | 7 (<0.1) | 0 (0.0)  | 0 (0.0)  | 1 (<0.1) |
| Haematuria                                                 | 5        | 0        | 0        | 1        |
| Nephritis                                                  | 1        | 0        | 0        | 0        |
| Dysuria                                                    | 1        | 0        | 0        | 0        |
| <b>Respiratory, thoracic, and mediastinal disorders</b>    | 2 (<0.1) | 1 (<0.1) | 0 (0.0)  | 0 (0.0)  |
| Chest pain and Dyspnoea                                    | 1        | 0        | 0        | 0        |
| Bronchopneumonia                                           | 0        | 1        | 0        | 0        |
| Dyspnoea                                                   | 1        | 0        | 0        | 0        |
| <b>Cardiac disorders</b>                                   | 3 (<0.1) | 0 (0.0)  | 1 (<0.1) | 1 (<0.1) |
| Myocardial infarction                                      | 1        | 0        | 1        | 0        |
| Chest pain – cardiac                                       | 1        | 0        | 0        | 0        |
| Arrhythmia and Palpitation                                 | 1        | 0        | 0        | 0        |
| Palpitation                                                | 0        | 0        | 0        | 1        |
| <b>Vascular Disorders</b>                                  | 2 (<0.1) | 0 (0.0)  | 0 (0.0)  | 1 (<0.1) |
| Ischemic heart disease (the leading cause of death)        | 1        | 0        | 0        | 0        |
| Dizziness                                                  | 1        | 0        | 0        | 1        |
| <b>Injury, poisoning and procedural complications</b>      | 2 (<0.1) | 1 (<0.1) | 0 (0.0)  | 0 (0.0)  |
| Knee injury                                                | 1        | 0        | 0        | 0        |
| Traumatic intracranial                                     | 0        | 1        | 0        | 0        |
| Traumatic hand fracture                                    | 1        | 0        | 0        | 0        |
| <b>Neoplasms benign, malignant</b>                         | 2 (<0.1) | 0 (0.0)  | 0 (0.0)  | 0 (0.0)  |
| Cholangiocarcinoma                                         | 1        | 0        | 0        | 0        |
| Laryngeal cancer                                           | 1        | 0        | 0        | 0        |

Note: \*Some participants had more than one adverse events symptom; MedDRA: Medical Dictionary for Regulatory Activities Terminology

**eTable 9. The Number Needed to Vaccinate in Cohort 1 and Cohort 2**

| <b>Cohort</b>                           | <i>NNV</i> * | 95% CI     |
|-----------------------------------------|--------------|------------|
| Cohort 1: 14 days after the second dose | 32.3         | 24.4, 47.6 |
| Cohort 2: 14 days after the third dose  | 29.4         | 20.0, 55.6 |

NNV: Number needed to vaccinate. NNV is estimated using the cox regression model

**eTable 10. Reason for unmet inclusion criteria in screened participants**

| <b>Reason</b>                                                                                             | <b>Number of participants</b> |
|-----------------------------------------------------------------------------------------------------------|-------------------------------|
| Uncontrolled underlying diseases (type 2 diabetes mellitus, chronic renal disease, chronic liver disease) | 40                            |
| Immunomodulators/immunosuppressive usage                                                                  | 10                            |
| History of psychological disorders                                                                        | 5                             |
| Heavy smoker                                                                                              | 2                             |
| History of allergy                                                                                        | 2                             |
| History of tetanus toxoid vaccination within 3 months before the current study                            | 1                             |
| Other                                                                                                     | 10                            |

Among 24,126 participants who were screened, 70 participants did not meet the inclusion criteria and so, were not included in the study. In this regard, uncontrolled underlying diseases such as type 2 diabetes, chronic renal disease, respiratory disease, and chronic liver disease were among the most common reasons.

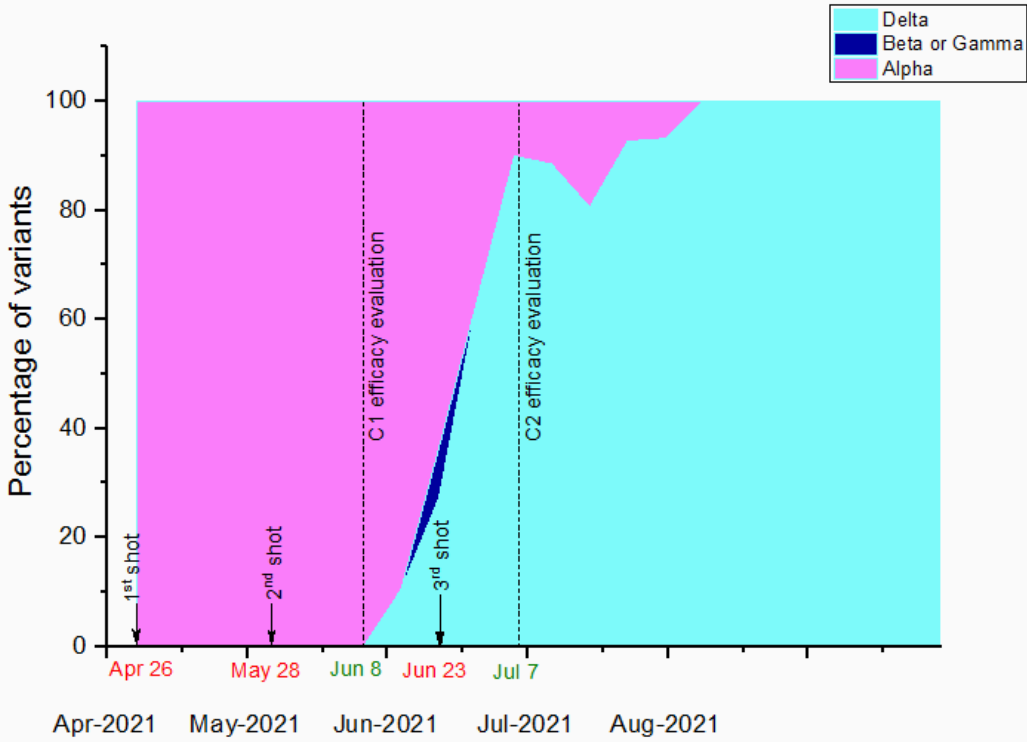

**eFigure 4. Percentage of different SARS-CoV-2 variants of concern during the study**

Note: 26-April start of the 1<sup>st</sup> dose, the 25-May start of the second dose, the 23-June start of the third dose. The dashed lines show the start of the C1 efficacy evaluation on 8 June and the start of the C2 efficacy evaluation on 7 July. (n=419 sequenced samples).

## eReferences

1. Pérez-Rodríguez S, de la Caridad Rodríguez-González M, Ochoa-Azze R, et al. A randomized, double-blind phase I clinical trial of two recombinant dimeric RBD COVID-19 vaccine candidates: Safety, reactogenicity and immunogenicity. *Vaccine* 2022; **40**(13): 2068-75.
2. Eugenia-Toledo-Romaní M, Verdecia-Sánchez L, Rodríguez-González M, et al. Safety and immunogenicity of anti-SARS CoV-2 vaccine SOBERANA 02 in homologous or heterologous scheme: Open label phase I and phase IIa clinical trials. *Vaccine* 2022; **40**(31): 4220-30.
3. Toledo-Romani ME, García-Carmenate M, Verdecia-Sánchez L, et al. Safety and immunogenicity of anti-SARS-CoV-2 heterologous scheme with SOBERANA 02 and SOBERANA Plus vaccines: Phase IIb clinical trial in adults. *Med (N Y)* 2022; **3**(11): 760-73.e5.
4. Ochoa-Azze R, Chang-Montegudo A, Climent-Ruiz Y, et al. Safety and immunogenicity of the FINLAY-FR-1A vaccine in COVID-19 convalescent participants: an open-label phase 2a and double-blind, randomised, placebo-controlled, phase 2b, seamless, clinical trial. *The Lancet Respiratory Medicine* 2022.
5. Statistical Centre of Iran. Findings of national population and household census. 2020. <https://www.amar.org.ir/english/Population-and-Housing-Censuses> (accessed 24 December 2021).
6. Worldometers. Iran COVID - Coronavirus Statistics - Worldometer. 2021. <https://www.worldometers.info/coronavirus/country/iran/> (accessed December 23 2021).
7. Ella R, Reddy S, Blackwelder W, et al. Efficacy, safety, and lot-to-lot immunogenicity of an inactivated SARS-CoV-2 vaccine (BBV152): interim results of a randomised, double-blind, controlled, phase 3 trial. *The Lancet* 2021; **398**(10317): 2173-84.
8. Tanriover MD, Doğanay HL, Akova M, et al. Efficacy and safety of an inactivated whole-virion SARS-CoV-2 vaccine (CoronaVac): interim results of a double-blind, randomised, placebo-controlled, phase 3 trial in Turkey. *The Lancet* 2021; **398**(10296): 213-22.
9. Hernán MA, Robins JM. Causal inference. CRC Boca Raton, FL;; 2010.
10. Hernán MA. The hazards of hazard ratios. *Epidemiology (Cambridge, Mass)* 2010; **21**(1): 13.
11. Dagan N, Barda N, Kepten E, et al. BNT162b2 mRNA Covid-19 vaccine in a nationwide mass vaccination setting. *New England Journal of Medicine* 2021.
12. World Health O. Causality assessment of an adverse event following immunization (AEFI): user manual for the revised WHO classification. 2nd , 2019 update ed. Geneva: World Health Organization; 2019.
