# Supplementary material for: Efficacy and Safety of a Protein-Based SARS-CoV-2 Vaccine: A Randomized Clinical Trial
Source: PubMed Central journal article supplement (PMC10157429; doi:10.1001/jamanetworkopen.2023.10302), 2023-05-03
Supplement: jamanetwopen-e2310302-s003.pdf [file jamanetwopen-e2310302-s003.pdf]

\*First name, last name, and suffix (if applicable) are required and will appear in PubMed.

| <b>*Group Name(s): The SOBERANA Study Group</b> |                       |                              |                         |                                       |                                                 |                                                                |                                                                                                   |  |  |
|-------------------------------------------------|-----------------------|------------------------------|-------------------------|---------------------------------------|-------------------------------------------------|----------------------------------------------------------------|---------------------------------------------------------------------------------------------------|--|--|
| <b>*First Name and Middle Initial(s)</b>        | <b>*Last Name</b>     | <b>*Suffix (eg, Jr, III)</b> | <b>Academic Degrees</b> | <b>Institution</b>                    | <b>Location (city, state/province, country)</b> | <b>Role or Contribution, eg, chair, principal investigator</b> | <b>Group (if more than 1 Group listed in the byline) and/or Subgroup (eg, Steering Committee)</b> |  |  |
| Behnaz                                          | Soleimani Tappeh Sari |                              |                         | Babol University of Medical Sciences  | Mazandaran, Babol, Iran                         | Executive manager                                              |                                                                                                   |  |  |
| Soheil                                          | Ebrahimpour           |                              |                         | Babol University of Medical Sciences  | Mazandaran, Babol, Iran                         | Vaccination site manager                                       |                                                                                                   |  |  |
| Rostam                                          | Heydar Tabar          |                              |                         | Babol University of Medical Sciences  | Mazandaran, Babol, Iran                         | Vaccination site manager                                       |                                                                                                   |  |  |
| Roghayye                                        | Vaseghi               |                              |                         | Babol University of Medical Sciences  | Mazandaran, Babol, Iran                         | Research physician                                             |                                                                                                   |  |  |
| Bahram                                          | Mirzaei               |                              |                         | Babol University of Medical Sciences  | Mazandaran, Babol, Iran                         | Research physician                                             |                                                                                                   |  |  |
| Mehdi                                           | Safarpour             |                              |                         | Babol University of Medical Sciences  | Mazandaran, Babol, Iran                         | System Administrator                                           |                                                                                                   |  |  |
| Farzin                                          | Sadeghi               |                              |                         | Babol University of Medical Sciences  | Mazandaran, Babol, Iran                         | Laboratory executive                                           |                                                                                                   |  |  |
| Mahmoud                                         | Hosseinpoor           |                              |                         | Hormozgan University of Medical Sci   | Hormozgan, Bandar Abbas                         | Senior executive manager                                       |                                                                                                   |  |  |
| Tayebeh                                         | Raznahan              |                              |                         | Hormozgan University of Medical Sci   | Hormozgan, Bandar Abbas                         | Executive manager                                              |                                                                                                   |  |  |
| Leila                                           | Haddadi               |                              |                         | Hormozgan University of Medical Sci   | Hormozgan, Bandar Abbas                         | Vaccination site manager                                       |                                                                                                   |  |  |
| Arezo                                           | Mobarak Abadi         |                              |                         | Hormozgan University of Medical Sci   | Hormozgan, Bandar Abbas                         | Vaccination site manager                                       |                                                                                                   |  |  |
| Elham                                           | Khalili               |                              |                         | Hormozgan University of Medical Sci   | Hormozgan, Bandar Abbas                         | Research physician                                             |                                                                                                   |  |  |
| Mehrsa                                          | Manaei                |                              |                         | Hormozgan University of Medical Sci   | Hormozgan, Bandar Abbas                         | Research physician                                             |                                                                                                   |  |  |
| Hassan                                          | Morshedi              |                              |                         | Hormozgan University of Medical Sci   | Hormozgan, Bandar Abbas                         | System Administrator                                           |                                                                                                   |  |  |
| Hamed                                           | Gooklani              |                              |                         | Hormozgan University of Medical Sci   | Hormozgan, Bandar Abbas                         | Laboratory executive                                           |                                                                                                   |  |  |
| Manouchehr                                      | Karami                |                              |                         | Hamadan University of Medical Scier   | Hamadan, Iran                                   | Senior executive manager                                       |                                                                                                   |  |  |
| Mohammad                                        | Khazaei               |                              |                         | Hamadan University of Medical Scier   | Hamadan, Iran                                   | Senior executive manager                                       |                                                                                                   |  |  |
| Seyyed Jalaeddin                                | Bathaei               |                              |                         | Hamadan University of Medical Scier   | Hamadan, Iran                                   | Executive manager                                              |                                                                                                   |  |  |
| Ali                                             | Ataei                 |                              |                         | Hamadan University of Medical Scier   | Hamadan, Iran                                   | Executive manager                                              |                                                                                                   |  |  |
| Ali                                             | Zahiri                |                              |                         | Hamadan University of Medical Scier   | Hamadan, Iran                                   | Vaccination site manager                                       |                                                                                                   |  |  |
| Zahra                                           | Eskandari             |                              |                         | Hamadan University of Medical Scier   | Hamadan, Iran                                   | Vaccination site manager                                       |                                                                                                   |  |  |
| Firouzeh                                        | Karbalaei Zadeh       |                              |                         | Hamadan University of Medical Scier   | Hamadan, Iran                                   | Research physician                                             |                                                                                                   |  |  |
| Elham                                           | Abdoli                |                              |                         | Hamadan University of Medical Scier   | Hamadan, Iran                                   | Research Physician                                             |                                                                                                   |  |  |
| Marzieh                                         | Arjmandian            |                              |                         | Hamadan University of Medical Scier   | Hamadan, Iran                                   | Research Physician                                             |                                                                                                   |  |  |
| Maryam                                          | Zamanian              |                              |                         | Hamadan University of Medical Scier   | Hamadan, Iran                                   | Research Physician                                             |                                                                                                   |  |  |
| Razieh                                          | Sadat Mirmoeini       |                              |                         | Hamadan University of Medical Scier   | Hamadan, Iran                                   | Research Physician                                             |                                                                                                   |  |  |
| Seyyede Zeinab                                  | Hashemi               |                              |                         | Hamadan University of Medical Scier   | Hamadan, Iran                                   | System Administrator                                           |                                                                                                   |  |  |
| Farid                                           | Azizi Jalilian        |                              |                         | Hamadan University of Medical Scier   | Hamadan, Iran                                   | Laboratory executive                                           |                                                                                                   |  |  |
| Kamal                                           | Heidari               |                              |                         | Deputy of Health, Isfahan University  | Isfahan, Iran                                   | Senior executive manager                                       |                                                                                                   |  |  |
| Mehdi                                           | Farsi                 |                              |                         | CDC, Isfahan University of Medical Sc | Isfahan, Iran                                   | Executive manager                                              |                                                                                                   |  |  |
| Mahnaz                                          | Mostajeran            |                              |                         | Department of Demography, Health      | Isfahan, Iran                                   | Vaccination site manager                                       |                                                                                                   |  |  |
| Marjan                                          | Mashkooti             |                              |                         | Isfahan University of Medical Science | Isfahan, Iran                                   | Research physician                                             |                                                                                                   |  |  |
| Somayye                                         | Davashi               |                              |                         | Isfahan University of Medical Science | Isfahan, Iran                                   | Research physician                                             |                                                                                                   |  |  |
| Nastaran                                        | Kian Poor             |                              |                         | Isfahan University of Medical Science | Isfahan, Iran                                   | Research physician                                             |                                                                                                   |  |  |

## Supplemental Online Content: Nonauthor Collaborators

\*First name, last name, and suffix (if applicable) are required and will appear in PubMed.

| *First Name and Middle Initial(s) | *Last Name         | *Suffix (eg, Jr, III) | Academic Degrees | Institution                              | Location (city, state/province, country) | Role or Contribution, eg, chair, principal investigator | Group (if more than 1 Group listed in the byline) and/or Subgroup (eg, Steering Committee) |  |  |
|-----------------------------------|--------------------|-----------------------|------------------|------------------------------------------|------------------------------------------|---------------------------------------------------------|--------------------------------------------------------------------------------------------|--|--|
| Asefeh                            | Haddadpour         |                       |                  | Isfahan University of Medical Science    | Isfahan, Iran                            | System Administrator                                    |                                                                                            |  |  |
| Fariba                            | Mazrooei           |                       |                  | Isfahan University of Medical Science    | Isfahan, Iran                            | Laboratory executive                                    |                                                                                            |  |  |
| Hossein                           | Safizadeh          |                       |                  | Kerman University of Medical Science     | Kerman, Iran                             | Senior executive manager                                |                                                                                            |  |  |
| Mohammadreza                      | Naghavi            |                       |                  | Kerman University of Medical Science     | Kerman, Iran                             | Executive manager                                       |                                                                                            |  |  |
| Saeed                             | Sohbati            |                       |                  | Kerman University of Medical Science     | Kerman, Iran                             | Research physician                                      |                                                                                            |  |  |
| Nadia                             | Mohit Kermani      |                       |                  | Kerman University of Medical Science     | Kerman, Iran                             | Research physician                                      |                                                                                            |  |  |
| Nasim                             | Nasiri Moghaddam   |                       |                  | Kerman University of Medical Science     | Kerman, Iran                             | System Administrator                                    |                                                                                            |  |  |
| Shahriar                          | Dabiri             |                       |                  | Kerman University of Medical Science     | Kerman, Iran                             | Laboratory executive                                    |                                                                                            |  |  |
| Ghasem                            | Oveis              |                       |                  | Mazandaran University of Medical Science | Mazandaran, Sari, Iran                   | Senior executive manager                                |                                                                                            |  |  |
| Mohammadreza                      | Parsaei            |                       |                  | Mazandaran University of Medical Science | Mazandaran, Sari, Iran                   | Executive manager & vaccination site manager            |                                                                                            |  |  |
| Maghsood                          | Khalizadeh         |                       |                  | Mazandaran University of Medical Science | Mazandaran, Sari, Iran                   | Research physician                                      |                                                                                            |  |  |
| Abbas                             | Arjmand            |                       |                  | Mazandaran University of Medical Science | Mazandaran, Sari, Iran                   | Research physician                                      |                                                                                            |  |  |
| Fatemeh                           | Yazdi Zadeh        |                       |                  | Mazandaran University of Medical Science | Mazandaran, Sari, Iran                   | Research physician                                      |                                                                                            |  |  |
| Hadi                              | Dehbashi araghdari |                       |                  | Mazandaran University of Medical Science | Mazandaran, Sari, Iran                   | System Administrator                                    |                                                                                            |  |  |
| Zainab                            | Bandalizadeh       |                       |                  | Mazandaran University of Medical Science | Mazandaran, Sari, Iran                   | Laboratory executive                                    |                                                                                            |  |  |
| Mohammadreza                      | Dehghani           |                       |                  | Yazd University of Medical Sciences      | Yazd, Iran                               | Senior executive manager                                |                                                                                            |  |  |
| Mehرداد                           | Mansouri           |                       |                  | Yazd University of Medical Sciences      | Yazd, Iran                               | Vaccination site manager and research physician         |                                                                                            |  |  |
| Masoud                            | Sharifi            |                       |                  | Yazd University of Medical Sciences      | Yazd, Iran                               | Executive manager                                       |                                                                                            |  |  |
| Hossein                           | Shojaei Far        |                       |                  | Yazd University of Medical Sciences      | Yazd, Iran                               | Executive manager                                       |                                                                                            |  |  |
| Javad                             | Soheili            |                       |                  | Yazd University of Medical Sciences      | Yazd, Iran                               | Executive manager                                       |                                                                                            |  |  |
| Sina                              | Owlia              |                       |                  | Yazd University of Medical Sciences      | Yazd, Iran                               | Research physician                                      |                                                                                            |  |  |
| Masoumeh                          | Mazidi             |                       |                  | Yazd University of Medical Sciences      | Yazd, Iran                               | Research physician                                      |                                                                                            |  |  |
| Mohammad                          | Sharif Yazdi       |                       |                  | Yazd University of Medical Sciences      | Yazd, Iran                               | Scientific manager                                      |                                                                                            |  |  |
| Mahdieh                           | Bahri              |                       |                  | Yazd University of Medical Sciences      | Yazd, Iran                               | Research physician                                      |                                                                                            |  |  |
| Razieh Sadat                      | Hashemi            |                       |                  | Yazd University of Medical Sciences      | Yazd, Iran                               | Research physician                                      |                                                                                            |  |  |
| Alireza                           | Talebi             |                       |                  | Yazd University of Medical Sciences      | Yazd, Iran                               | Laboratory executive                                    |                                                                                            |  |  |
| Saeideh                           | Anvari             |                       |                  | Yazd University of Medical Sciences      | Yazd, Iran                               | System Administrator                                    |                                                                                            |  |  |
| Ahmad                             | Jafari             |                       |                  | Yazd University of Medical Sciences      | Yazd, Iran                               | Vaccination site manager                                |                                                                                            |  |  |
| Mohammadreza                      | Saeini             |                       |                  | Center for Diseases Control, Zanjan U    | Zanjan, Iran                             | Senior executive manager                                |                                                                                            |  |  |
| Fariba                            | Najafi             |                       |                  | Zanjan University of Medical Science     | Zanjan, Iran                             | Vaccination site manager                                |                                                                                            |  |  |
| Davoud                            | Rahmani            |                       |                  | Zanjan University of Medical Science     | Zanjan, Iran                             | Research physician                                      |                                                                                            |  |  |
| Ali                               | Seidy              |                       |                  | Zanjan University of Medical Science     | Zanjan, Iran                             | Research physician                                      |                                                                                            |  |  |
| Mahshid                           | Hajikhani          |                       |                  | Zanjan University of Medical Science     | Zanjan, Iran                             | System Administrator                                    |                                                                                            |  |  |
| Hossein                           | Dinmohammadi       |                       |                  | Zanjan University of Medical Science     | Zanjan, Iran                             | Laboratory executive                                    |                                                                                            |  |  |
| Amir                              | Javadi             |                       |                  | Department of Community Medicine         | Ghazvin, Iran                            | A member of the Monitoring and Audit team               |                                                                                            |  |  |
| Seyed Ebrahim                     | Eskandari          |                       |                  | Center for Research and Training in S    | Tehran, Iran                             | A member of the Monitoring and Audit team               |                                                                                            |  |  |

## Supplemental Online Content: Nonauthor Collaborators

\*First name, last name, and suffix (if applicable) are required and will appear in PubMed.

| *First Name and Middle Initial(s) | *Last Name      | *Suffix (eg, Jr, III) | Academic Degrees | Institution                                        | Location (city, state/province, country) | Role or Contribution, eg, chair, principal investigator     | Group (if more than 1 Group listed in the byline) and/or Subgroup (eg, Steering Committee) |  |  |
|-----------------------------------|-----------------|-----------------------|------------------|----------------------------------------------------|------------------------------------------|-------------------------------------------------------------|--------------------------------------------------------------------------------------------|--|--|
| Farhad                            | Handjani        |                       |                  | Department of Dermatology, School of               | Fars, Shiraz , Iran                      | A member of the Monitoring and Audit team                   |                                                                                            |  |  |
| Maryam                            | Chegeni         |                       |                  | Molecular and Medicine Research Center             | Markazi, Khomein, Iran                   | A member of the team of technical consultants               |                                                                                            |  |  |
| Katayoun                          | Seif Farahi     |                       |                  | Center for Communicable Diseases Control           | Tehran, Iran                             | A member of the team of technical consultants               |                                                                                            |  |  |
| Payman                            | Hemmati         |                       |                  | Center for Communicable Diseases Control           | Tehran, Iran                             | A member of the team of technical consultants               |                                                                                            |  |  |
| Mahsa                             | Tavakoli Rad    |                       |                  | National Reference Laboratory for COVID-19         | Tehran, Iran                             | A member of the COVID-19 National Reference Laboratory team |                                                                                            |  |  |
| Zahra                             | Fereidooni      |                       |                  | National Reference Laboratory for COVID-19         | Tehran, Iran                             | A member of the COVID-19 National Reference Laboratory team |                                                                                            |  |  |
| Sahar                             | Khakifirouz     |                       |                  | National Reference Laboratory for COVID-19         | Tehran, Iran                             | A member of the COVID-19 National Reference Laboratory team |                                                                                            |  |  |
| Tahereh                           | Mohammadi       |                       |                  | National Reference Laboratory for COVID-19         | Tehran, Iran                             | A member of the COVID-19 National Reference Laboratory team |                                                                                            |  |  |
| Mehdi                             | Fazlalipour     |                       |                  | National Reference Laboratory for COVID-19         | Tehran, Iran                             | A member of the COVID-19 National Reference Laboratory team |                                                                                            |  |  |
| Ali                               | Maleki          |                       |                  | National Reference Laboratory for COVID-19         | Tehran, Iran                             | A member of the COVID-19 National Reference Laboratory team |                                                                                            |  |  |
| Amir Hesam                        | Nemati          |                       |                  | National Reference Laboratory for COVID-19         | Tehran, Iran                             | A member of the COVID-19 National Reference Laboratory team |                                                                                            |  |  |
| Ahmad                             | Ghasemi         |                       |                  | National Reference Laboratory for COVID-19         | Tehran, Iran                             | A member of the COVID-19 National Reference Laboratory team |                                                                                            |  |  |
| Sanam                             | Azad Manjiri    |                       |                  | National Reference Laboratory for COVID-19         | Tehran, Iran                             | A member of the COVID-19 National Reference Laboratory team |                                                                                            |  |  |
| Zahra                             | Ahmadi          |                       |                  | National Reference Laboratory for COVID-19         | Tehran, Iran                             | A member of the COVID-19 National Reference Laboratory team |                                                                                            |  |  |
| Parastoo                          | Yekta Sanati    |                       |                  | National Reference Laboratory for COVID-19         | Tehran, Iran                             | A member of the COVID-19 National Reference Laboratory team |                                                                                            |  |  |
| Setareh                           | Kashanian       |                       |                  | National Reference Laboratory for COVID-19         | Tehran, Iran                             | A member of the COVID-19 National Reference Laboratory team |                                                                                            |  |  |
| Mohammad Mehdi                    | Mortazavipour   |                       |                  | National Reference Laboratory for COVID-19         | Tehran, Iran                             | A member of the COVID-19 National Reference Laboratory team |                                                                                            |  |  |
| Laya                              | Farhan Asadi    |                       |                  | National Reference Laboratory for COVID-19         | Tehran, Iran                             | A member of the COVID-19 National Reference Laboratory team |                                                                                            |  |  |
| Zahra                             | Hosseini        |                       |                  | National Reference Laboratory for COVID-19         | Tehran, Iran                             | A member of the COVID-19 National Reference Laboratory team |                                                                                            |  |  |
| Farideh                           | Niknam Oskouei  |                       |                  | National Reference Laboratory for COVID-19         | Tehran, Iran                             | A member of the COVID-19 National Reference Laboratory team |                                                                                            |  |  |
| Sepideh                           | Gerdooei        |                       |                  | National Reference Laboratory for COVID-19         | Tehran, Iran                             | A member of the COVID-19 National Reference Laboratory team |                                                                                            |  |  |
| Marzye                            | Sajadi          |                       |                  | National Reference Laboratory for COVID-19         | Tehran, Iran                             | A member of the COVID-19 National Reference Laboratory team |                                                                                            |  |  |
| Maryam                            | Rostamtabar     |                       |                  | National Reference Laboratory for COVID-19         | Tehran, Iran                             | A member of the COVID-19 National Reference Laboratory team |                                                                                            |  |  |
| Talieh                            | Sabouni         |                       |                  | Production and Research Complex, Pasteur Institute | Tehran, Iran                             | A member of the Manufacture, Packaging and Labeling team    |                                                                                            |  |  |
| Alireza                           | Rahimi          |                       |                  | Production and Research Complex, Pasteur Institute | Tehran, Iran                             | A member of the Manufacture, Packaging and Labeling team    |                                                                                            |  |  |
| Alireza                           | Kavianpour      |                       |                  | Production and Research Complex, Pasteur Institute | Tehran, Iran                             | A member of the Manufacture, Packaging and Labeling team    |                                                                                            |  |  |
| Seyed Mohsen                      | Zahraei         |                       |                  | Center for Communicable Disease Control            | Tehran, Iran                             | A member of the Adverse Event Evaluation Committee          |                                                                                            |  |  |
| Katayoun                          | Tayeri          |                       |                  | National HIV/AIDS Care & Treatment Center          | Tehran, Iran                             | A member of the Adverse Event Evaluation Committee          |                                                                                            |  |  |
| Ali                               | Asadollahi Amin |                       |                  | Iranian Research Center for HIV/AIDS               | Tehran, Iran                             | A member of the Adverse Event Evaluation Committee          |                                                                                            |  |  |
| Hamid Reza                        | Tohidnik        |                       |                  | HIV/STI Surveillance Research Center               | Kerman, Iran                             | A member of the Data Analysis Committee                     |                                                                                            |  |  |
| Azam                              | Rastegari       |                       |                  | Modeling in Health Research Center                 | Kerman, Iran                             | A member of the Data Analysis Committee                     |                                                                                            |  |  |
| Soheil                            | Mehmandoost     |                       |                  | HIV/STI Surveillance Research Center               | Kerman, Iran                             | A member of the Data Analysis Committee                     |                                                                                            |  |  |
